# Supplementary material for: An Msx2-Sp6-Follistatin Pathway Operates During Late Stages of Tooth Development to Control Amelogenesis
Source: PubMed Central journal article supplement (PMC7649293; doi:10.3389/fphys.2020.582610), 2020-10-26
Supplement: Table_1.pdf [file Table_1.pdf]

Supplemental Table 1

| <b>Gene name</b>                                 | <b>Forward primer</b>         | <b>Reverse primer</b>         |
|--------------------------------------------------|-------------------------------|-------------------------------|
| <i>Gapdh</i>                                     | 5'CATTGACCTCAACTACATGG3'      | 5'CTCAGTGTAGCCCAGGATGC3'      |
| <i>Msx2</i>                                      | 5'TCCGCCAGAAACAGTACCTC3'      | 5'GCAGCCATTTTCAGCTTTTC3'      |
| <i>Fst</i>                                       | 5'TTTTCTGTCCAGGCAGCTCCAC3'    | 5'GCAAGATCCGGAGTGCTTCACT3'    |
| <i>Sp6</i>                                       | 5'CCGGCAATGCTAACCGCTGTCTGTG3' | 5'GGCTCAGTTGGAGGACGCCGAGCTG3' |
| <i>Lama3</i>                                     | 5'GGCCAAGTGGAGTTTGACAT3'      | 5'TGTCTCCTCCACAACCTGCTG3'     |
| <i>Sprouty2</i>                                  | 5'GGGTTAGGGGATTTGTGGTT3'      | 5'GCAATGTGGGTCTCCAACCTT3'     |
| <i>Sp3</i>                                       | 5'ACGCTCAGCAGGTTTCAGATT3'     | 5'AGTTTGGCCAGGAAATGATG3'      |
| <i>Connexin45</i>                                | 5'GAACACGGCAAGGTGAAGAT3'      | 5'GAGCGAGAGACACCAAGGAC3'      |
| <i>Wnt3</i>                                      | 5'GCGACTTCCTCAAGGACAAG3'      | 5'AAAGTTGGGGGAGTTCTCGT3'      |
| <i>Tgfβ1</i>                                     | 5'TTGCTTCAGCTCCACAGAGA3'      | 5'TGGTTGTAGAGGGCAAGGAC3'      |
| <i>Enamelin</i>                                  | 5'AACCAGTCCACAGGACCAAG3'      | 5'CCAGAGGCCCAATCTCATT3'       |
| <i>Tbx1</i>                                      | 5'ATGGGACGAGTTCAATCAG3'       | 5'GTACCGGTAGCCTTGTCAT3'       |
| <i>Amelogenin</i>                                | 5'CAAGAAATGGGGACCTGGATC3'     | 5'GCTGCCTTATCATGCTCTGG3'      |
| <i>Ameloblastin</i>                              | 5'CATGTCTTATGGAGCAAACCA3'     | 5'TCTTGCAGTGGAGAGCCTTCT3'     |
|                                                  |                               |                               |
| <b>Primers for Msx2 promoter binding Regions</b> |                               |                               |
| <b>F1-R1</b>                                     | 5'TGCAGAAATTCTTCCCCTCT3'      | 5'AAAGCCAAACATCAGGGCTA3'      |
| <b>F2-R2</b>                                     | 5'TATGTGTGCATTGGGCATTT3'      | 5'TTCATCTTGCAGGTCACAGC3'      |
| <b>F3-R3</b>                                     | 5'TTGGCTCTTGCATGTGGATA3'      | 5'CAACATGGAGGAGGAACTCG3'      |
| <b>F4-R4</b>                                     | 5'CTGAACTTCCTGCTCCACCT3'      | 5'CTTGTGGTTTCCACATGCAC3'      |
| <b>F5-R5</b>                                     | 5'AGCTCCCTTGTCTGAAGATCA3'     | 5'CACCATGCCTGACCTAAAGC3'      |
| <b>F6-R6</b>                                     | 5'GCTTTTCC CACTTTCTCCT3'      | 5'CGACAAGGGAGCTAAAACCA3'      |
